# Supplementary material for: Tiller estimation method using deep neural networks
Source: Frontiers journal article supplement (doi:10.3389/fpls.2022.1016507), 2023-01-13
Supplement: Data_Sheet_1.PDF [file Data_Sheet_1.PDF]

## Supplementary Material

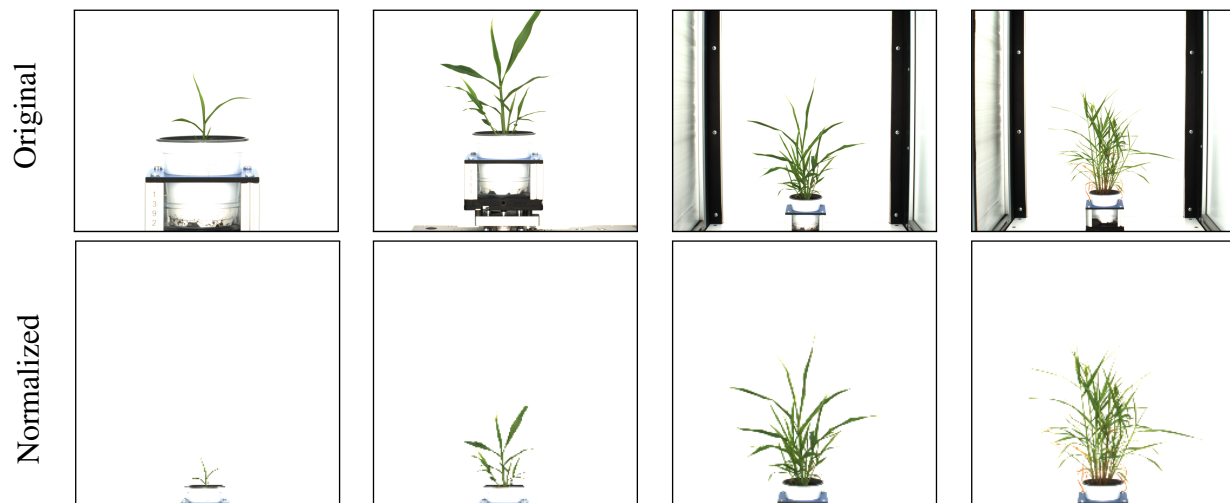

**Figure S1.** Examples of the images used for the experiments. The first row shows original images taken at different magnifications. The second row shows normalized images in which the pot is the same size.
